# Supplementary material for: Spatial Analysis of UAS-generated data to Evaluate Nitrogen Fertilizer Placement Alternatives, Predict and Map End-of Season Rice Yield
Source: Preprints.org preprint supplement (doi:10.20944/preprints202310.1665.v1), 2023-10-26
Supplement: Supplementary file 3 [file supplementary]

**Addressing Editors Suggestions - agriculture-2378494**

1. The definition of crop health is necessary.

Response

Crop health is defined in the introduction based on the vegetation index in lines 88 – 96 (in red) of the attached revised manuscript.

1. is hardly understandable. How are Activity, Process, and Output related?

Response

The figure has been modified as follows to address the concerns.

1. Activities, processes, and outputs have been color-coded for clarity and comprehension.
2. Horizontal arrows are inserted to show the progression of activities, processes, and outputs.

(c) Vertical arrows show the relationships between activities, processes, and outputs.

(3) How was Jenks natural breaks classification utilized?

Response

The rationale and suitability of the Jenks natural breaks classification system in this study are discussed in the materials and methods section of the paper in lines 278 – 280. This is further reinforced in the discussion section in lines 616 – 618.

(4) The authors should check the figures on the printed version. Most texts and symbols are unreadable in the figures. Format of figures should follow other publications in this journal. Uppercase and lowercase letters are not unified. Outlines of graph may be not necessary.

Response

All the figures have been redrawn to follow publication guidelines as follows:

(a) All font sizes are appropriately increased for clear readability

(b) Color delineations are enhanced

(c) Upper and lower cases are unified

(d) Outlines are removed from all graphs.

Thanks for your kind evaluation of our paper and please let us know if we can answer further questions.
